# Supplementary material for: Origin, maintenance and spread of antibiotic resistance genes within plasmids and chromosomes of bloodstream isolates of Escherichia coli
Source: PubMed Central journal article supplement (PMC7276700; doi:10.1099/mgen.0.000353), 2020-03-11
Supplement: mgen-6-353-s001.pdf [file mgen-6-353-s001.pdf]

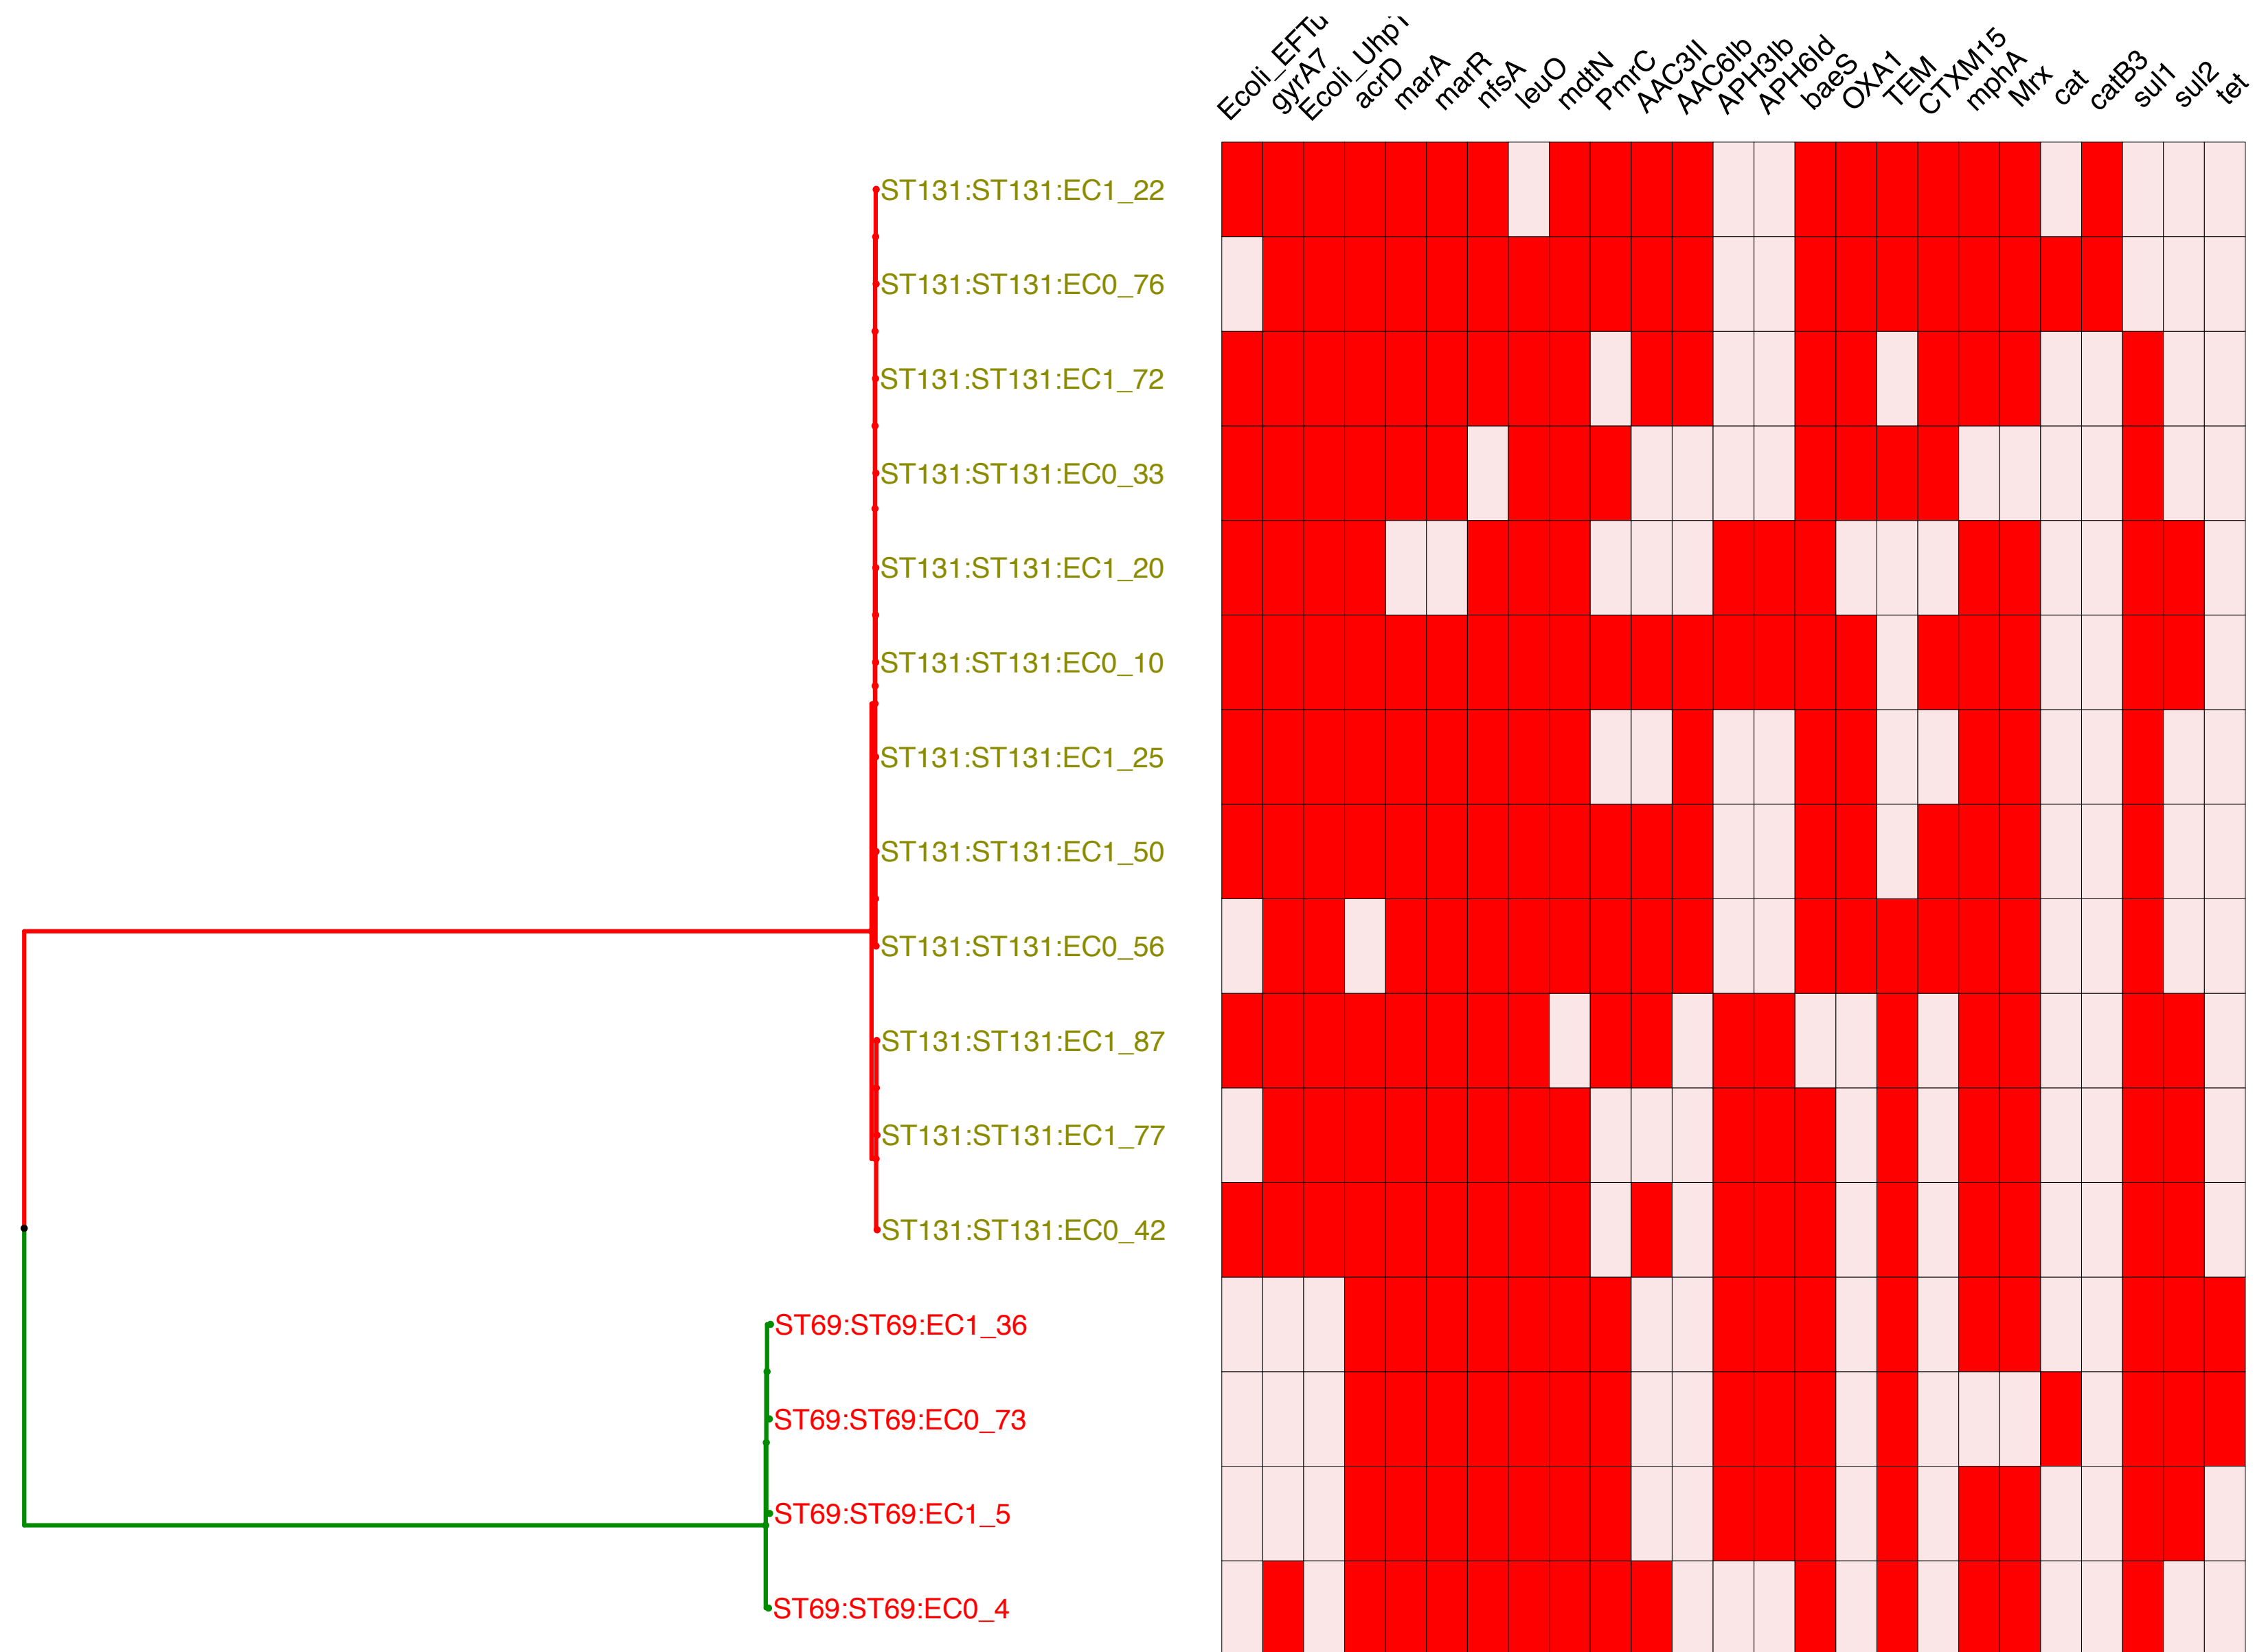

Figure S1. **Maximum likelihood phylogenetic tree of the 16 bloodstream isolates subjected to full sequencing with PacBio.** The table to the right shows the presence or absence of genes mediating antimicrobial resistance identified using the ARG-annot database as described in the Methods.

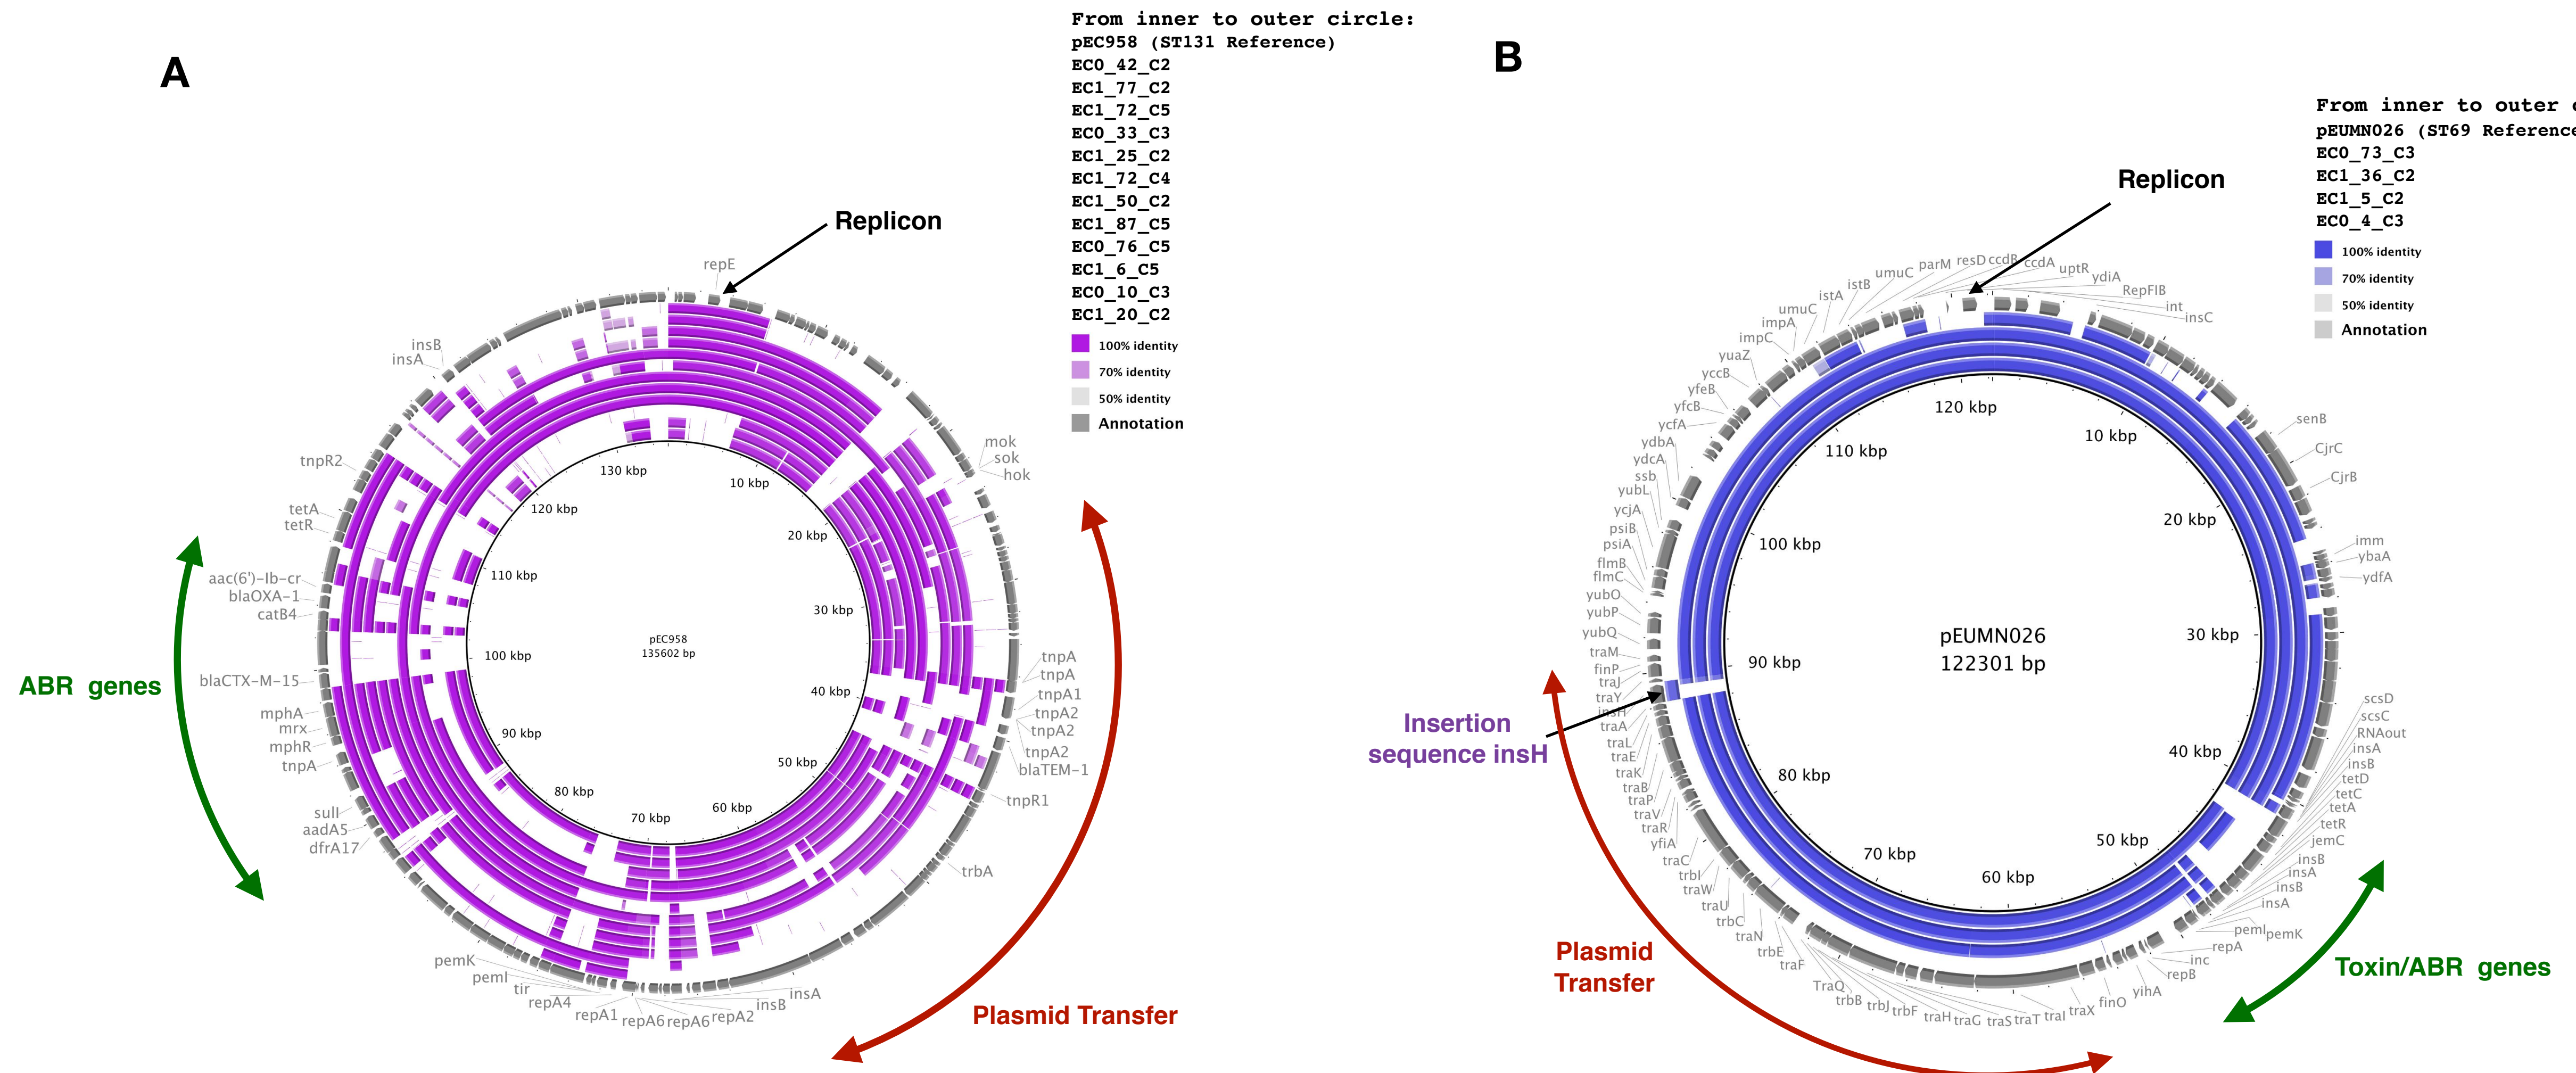

**Figure S2. Comparison of different IncF plasmids.**

Figure shows the degree of identity of plasmids from ST131 (A) and ST69 (B) aligned to reference pEC958 (A) or pEUMN026 (B). Gene annotations are shown on the outer ring and the various segments of the plasmids annotated as shown.

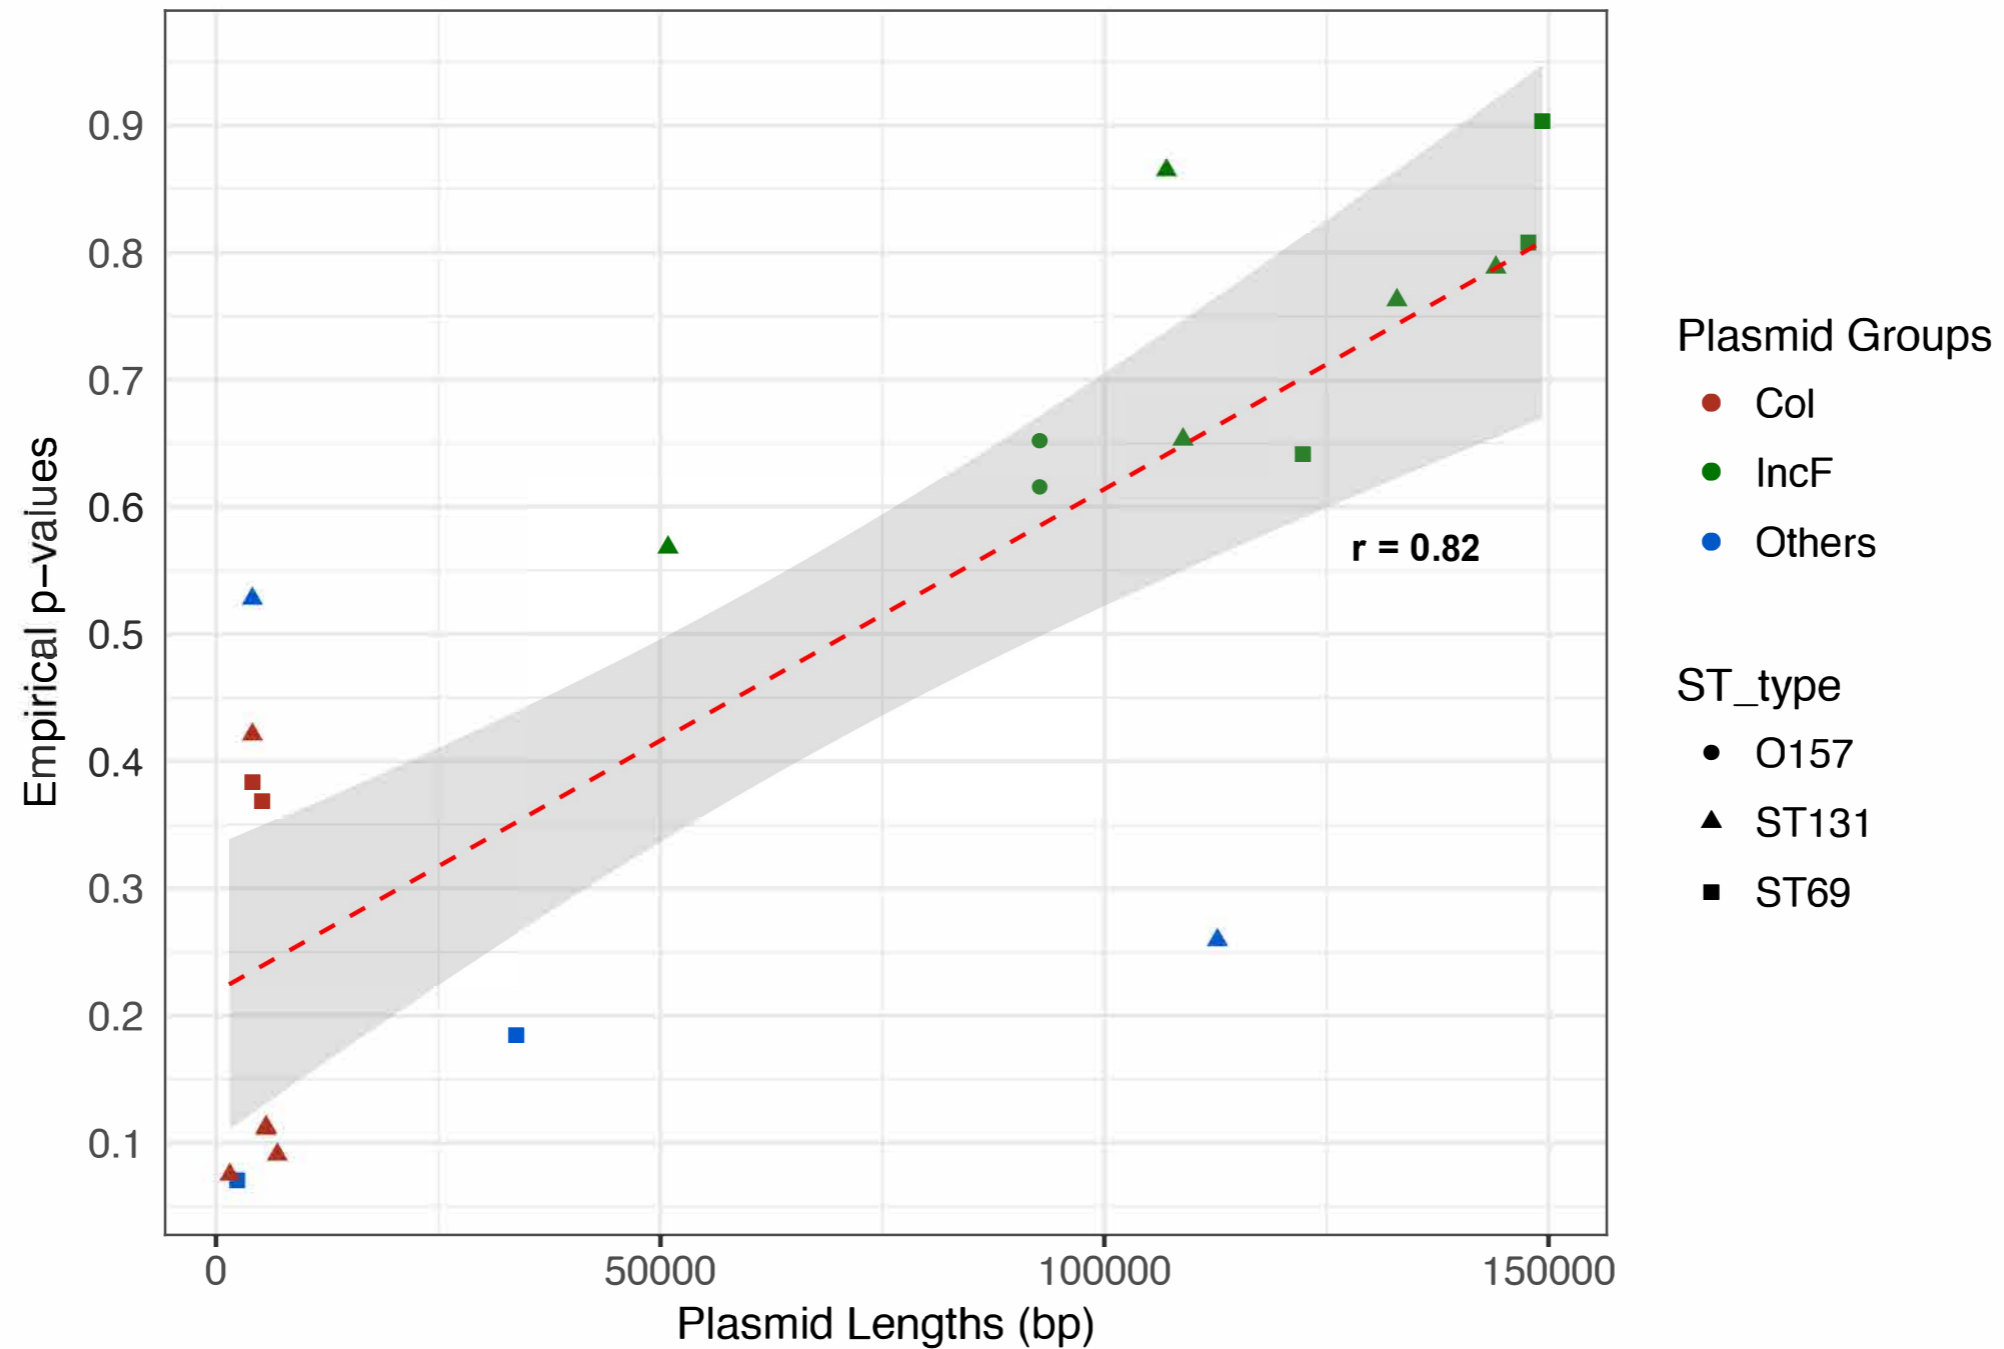

**Figure S3. Relationship between empirical Mahalanobis p values and plasmids length.** Empirical p value for the comparison of Mahalanobis distance difference between plasmid and chromosome were calculated as outlined in the Methods and plotted versus plasmid length for the indicated plasmids. A smooth linear regression is shown fitted (red dotted line) with 95% confidence intervals shown shaded; the fitted line was significant ( $p < 10^{-6}$ ), with correlation coefficient of 0.82. 2 IncF plasmids from E. coli strain O157 were included as further reference.

| <b>Plasmids</b>     | <b>Core genes<br/>(99%-100%)</b> | <b>Soft core (95% -<br/>99%)</b> | <b>Shell genes<br/>(15-95%)</b> | <b>Cloud genes<br/>(0-15%)</b> | <b>Total<br/>genes</b> |
|---------------------|----------------------------------|----------------------------------|---------------------------------|--------------------------------|------------------------|
| 16 IncF<br>plasmids | 0                                | 0                                | 282                             | 279                            | 561                    |
| 20 Col<br>plasmids  | 0                                | 0                                | 6                               | 30                             | 36                     |
| 8 Other<br>plasmids | 0                                | 0                                | 5                               | 399                            | 404                    |
| All<br>plasmids     | 0                                | 0                                | 133                             | 783                            | 916                    |

**Table S2. Gene sharing statistics between the fully-sequenced plasmids.**

| <b>Sample</b> | <b>Percent_Identity</b> | <b>Coverage</b> |
|---------------|-------------------------|-----------------|
| EC0_73_C3     | 99.95%                  | 84%             |
| EC1_36_C2     | 99.93%                  | 79%             |
| EC1_5_C2      | 99.94%                  | 78%             |
| EC0_42_C2     | 99.91%                  | 79%             |
| EC1_77_C2     | 99.97%                  | 78%             |

**Table S3. The percentage identity and coverage of the indicated plasmids to the plasmid p1ESCUM.**
